# Supplementary material for: Endothelial Unc5B controls blood-brain barrier integrity
Source: PubMed Central journal article supplement (PMC8897508; doi:10.1038/s41467-022-28785-9), 2022-03-04
Supplement: 41467_2022_28785_MOESM1_ESM.pdf [file 41467_2022_28785_MOESM1_ESM.pdf]

# Supp Fig. 1

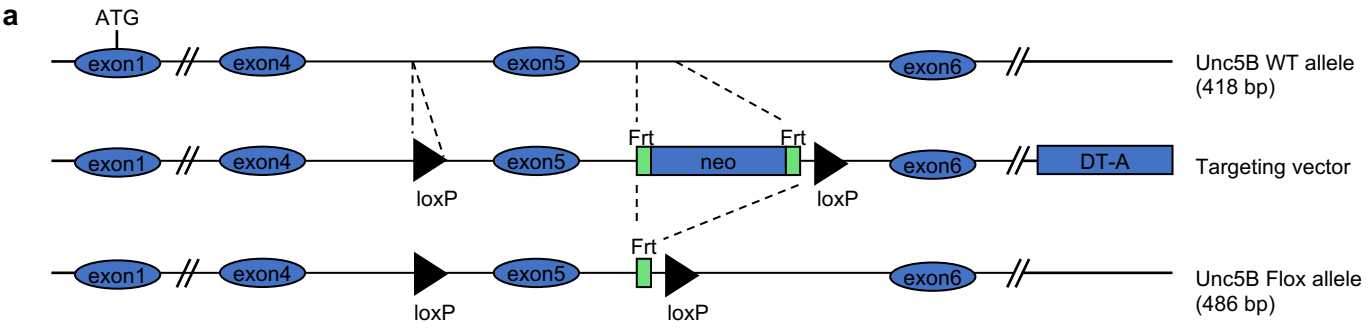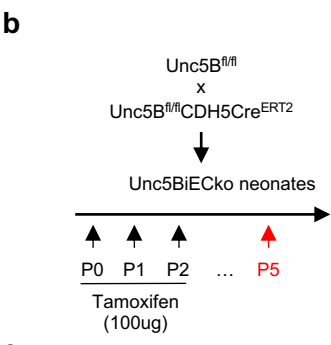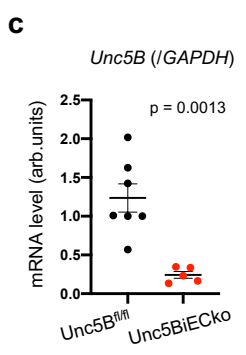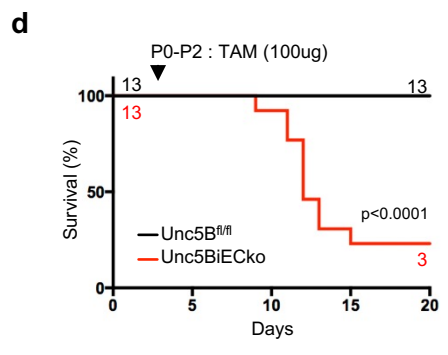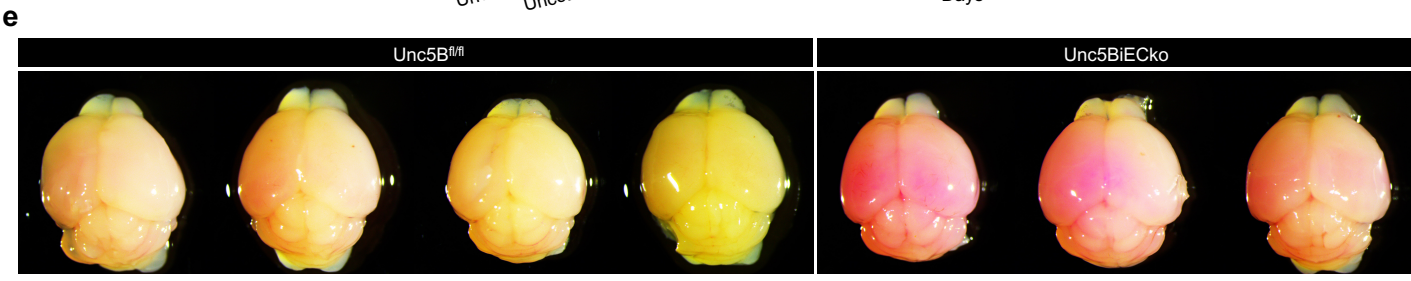

### Supplemental Figure 1:

(a) Diagram illustrating generation of the *Unc5B* Flox allele. (b) *Unc5B* gene deletion strategy using tamoxifen injection in postnatal mice. (c) qPCR analysis of *Unc5B* mRNA level on isolated P5 mouse lung endothelial cells, n=7 *Unc5B<sup>flox</sup>* and n=5 *Unc5B<sup>IEcko</sup>* brains. Each dot represents one mouse. One control mouse was set as 1. (d) Survival curve after neonatal *Unc5B* gene deletion, n=13 *Unc5B<sup>flox</sup>* and n=13 *Unc5B<sup>IEcko</sup>* (exact p-value = 0.000055). (e) Cadaverine leakage in P5 brains 2h after intraperitoneal cadaverine injection. All data are shown as mean+/-SEM. Two-sided Mann-Whitney U test was performed for statistical analysis between two groups. Mantel-cox test was performed for statistical analysis of the survival curve. Source data are provided as a Source Data file.

# Supp Fig. 2

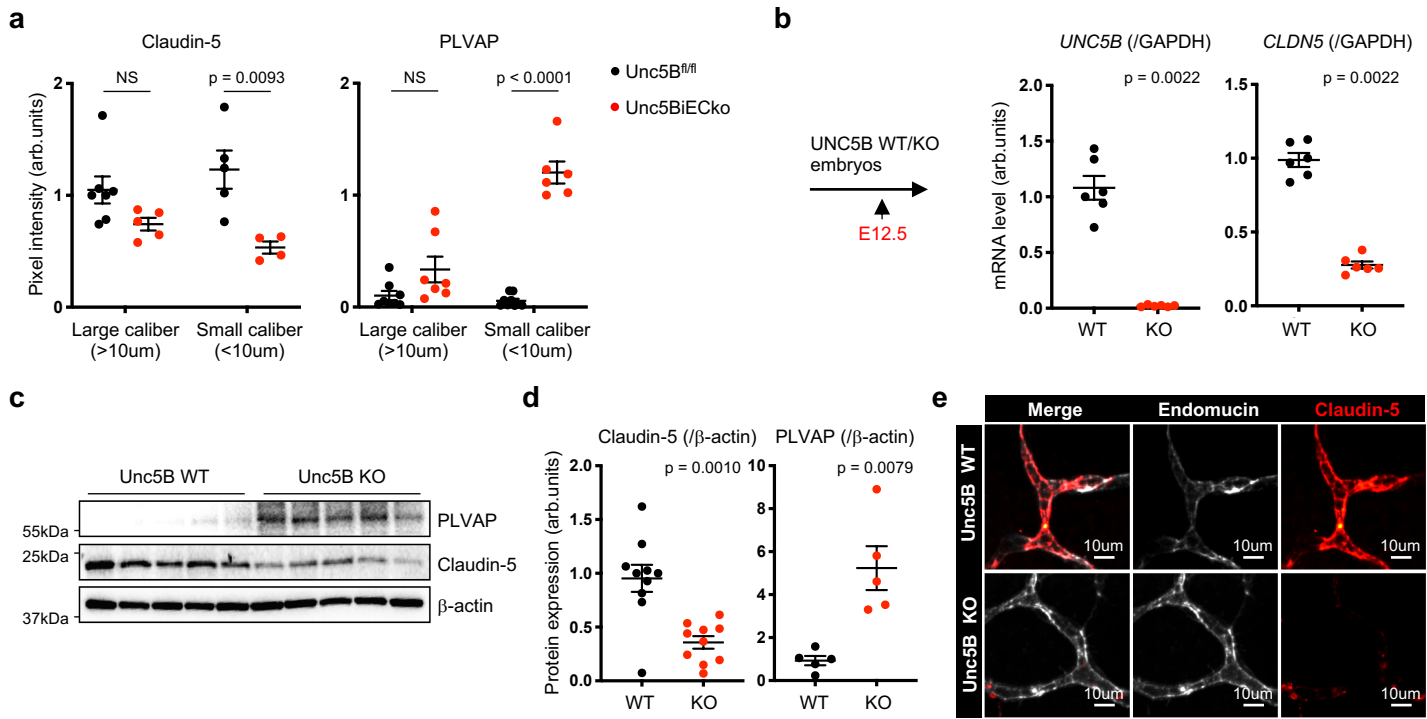

## Supplemental Figure 2:

(a) Quantification of Claudin-5 and PLVAP immunostaining on brain sections in larger vessels (diameter > 10um) versus smaller vessel (diameter < 10um). Each dot represents the mean of several images, n=5/7 *Unc5B<sup>fl/fl</sup>* and n=4/5 *Unc5BiECko* for quantification of Claudin-5 expression, n=8/9 *Unc5B<sup>fl/fl</sup>* and n=6/7 *Unc5BiECko* for quantification of PLVAP expression (exact p-value for small caliber vessel = 0.00000000009). One control mouse was set as 1. (b) qPCR analysis on E12.5 brain mRNA extracts, n=6 *Unc5B WT* and n=6 *Unc5B KO* embryos. Each dot represents one embryo. One control embryo was set as 1. (c,d) Western blot (c) and quantification (d) of E12.5 brain protein extracts. n=10 *Unc5B WT* and n=10 *Unc5B KO* embryos for Claudin-5 protein quantification, n=5 *Unc5B WT* and n=5 *Unc5B KO* embryos for PLVAP protein quantification. Each dot represents one embryo. One control embryo was set as 1. (e) Whole-mount hindbrain immunofluorescence staining with the indicated antibodies and confocal imaging of E12.5 embryos, reproduced on n=5 *Unc5B WT* and n=5 *Unc5B KO* embryos. All data are shown as mean+/-SEM. NS: non-significant, two-sided Mann-Whitney U test was performed for statistical analysis. Source data are provided as a Source Data file.



### Supplemental Figure 3:

(a) *Unc5B* deletion and *TCF/LEF:H2B-GFP* reporter strategy. (b) Immunofluorescence staining with the indicated antibodies and confocal imaging on P67 brain sections and quantification of ERG+ GFP levels (c). Each dot represents the mean of several images from one mouse, n=7 *Unc5B<sup>fl/fl</sup>;TCF/LEF:H2B-GFP* and n=6 *Unc5B<sup>iEcko</sup>;TCF/LEF:H2B-GFP* brains. One control mouse was set as 1. (d) *Ctnnb1* gene deletion strategy using tamoxifen injection. (e) Western blot and quantification (f) of P67 brain protein extracts, n=3 *Ctnnb1<sup>fl/fl</sup>* and n=5 *Ctnnb1<sup>fl/fl</sup>CDH5Cre<sup>ERT2</sup>* brains. Each dot represents one mouse. One control mouse was set as 1. (g) *Ctnnb1<sup>flex/3</sup>* overexpression strategy using tamoxifen injection. (h) Western blot and quantification (i) of P67 brain protein extracts, n=4/5 *Ctnnb1<sup>flex/3</sup>* and n=4/5 *Ctnnb1<sup>flex/3</sup>CDH5Cre<sup>ERT2</sup>* brains. Each dot represents one mouse. One control mouse was set as 1. All data are shown as mean+/-SEM. NS: non-significant, two-sided Mann-Whitney U test was performed for statistical analysis. Source data are provided as a Source Data file.

**Supp Fig. 4**

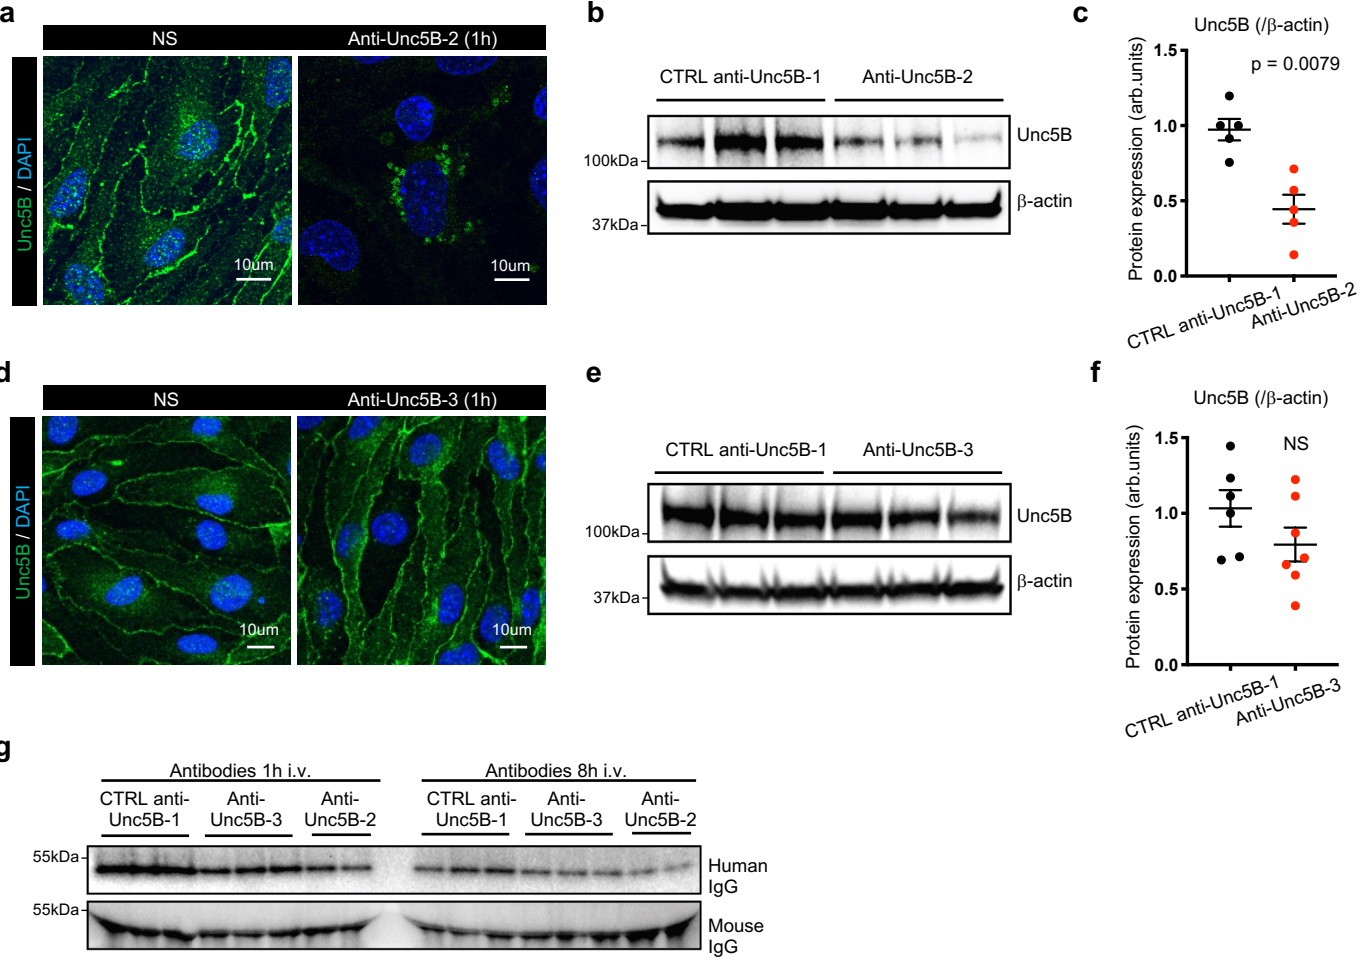

#### **Supplemental Figure 4:**

(a) Unc5B immunofluorescence staining using a commercial Unc5B antibody and confocal imaging of confluent monolayers of mouse brain ECs 1h after anti-Unc5B-2 treatment, reproduced on n=4 independent experiment. (b) Western blot and quantification (c) of brain protein extracts from mice i.v injected with CTRL anti-Unc5B-1 or anti-Unc5B-2 (10 mg/kg) for 1h, n=5 CTRL anti-Unc5B-1 and n=5 anti-Unc5B-2 treated mice. Each dot represents one mouse. One control mouse was set as 1. (d) Unc5B immunofluorescence staining using a commercial Unc5B antibody and confocal imaging of confluent monolayers of mouse brain ECs 1h after anti-Unc5B-3 treatment, reproduced on n=3 independent experiment. (e) Western blot and quantification (f) of brain protein extracts from mice i.v. injected with CTRL anti-Unc5B-1 or anti-Unc5B-3 (10 mg/kg) for 1h, n=6 CTRL anti-Unc5B-1 and n=7 anti-Unc5B-3 treated mice. Each dot represents one mouse. One control mouse was set as 1. (g) Western blot of serum samples from mice i.v. injected with antibodies (10 mg/kg) for 1h. Each lane represents one mouse. All data are shown as mean $\pm$ SEM. NS: non-significant, two-sided Mann-Whitney U test was performed for statistical analysis. Source data are provided as a Source Data file.



# Supp Fig. 5

**a**

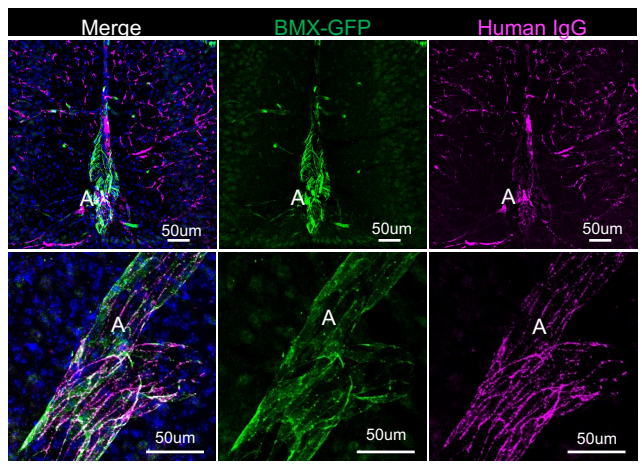

**b**

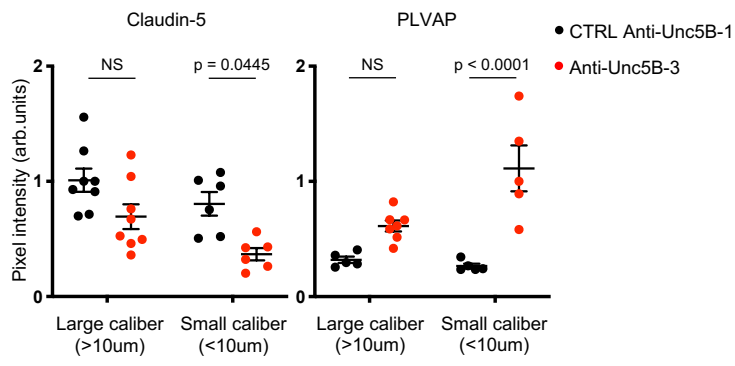

**c**

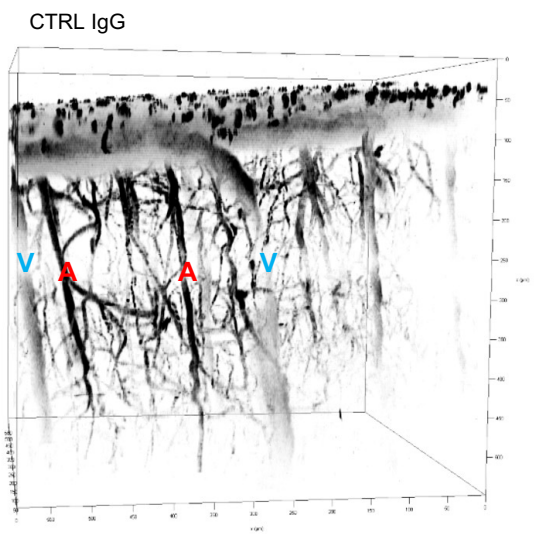

**d**

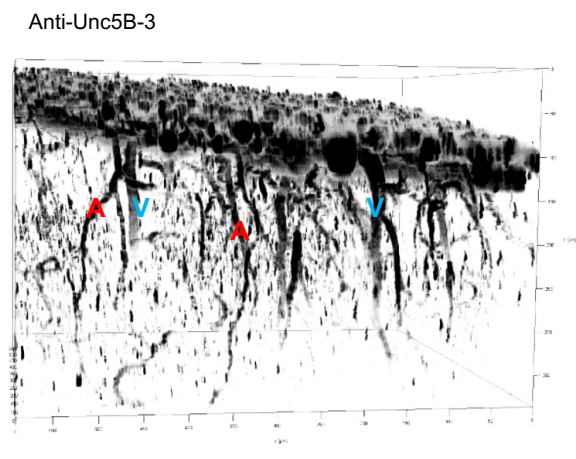

### Supplemental Figure 5:

(a) Tamoxifen was injected for 5 days in *BMXCre<sup>ERT2</sup>-mTmG* mice followed by anti-Unc5B-3 i.v. injection for 15 min. After cardiac perfusion, anti-Unc5B-3 binding was revealed by immunofluorescence using anti-human IgG antibody followed by confocal imaging and reproduced on n=3 animals. (b) Quantification of Claudin-5 and PLVAP immunostaining in larger (diameter > 10um) versus smaller vessel (diameter < 10um) on brain sections from mice i.v. injected with CTRL anti-Unc5B-1 or anti-Unc5B-3 (10 mg/kg) for 1h. Each dot represents the mean of several images, n=6/8 *Unc5B<sup>fl/fl</sup>* and n=6/8 *Unc5BiEcko* for quantification of Claudin-5 expression and n=5 *Unc5B<sup>fl/fl</sup>* and n=5/7 *Unc5BiEcko* for quantification of PLVAP expression (exact p-value for small caliber vessel = 0.000075). (c,d) Two-photon live imaging of WT mouse cortex 1h after i.v. injection of CTRL IgG or anti-Unc5B-3 (10 mg/kg) and 60 min after i.v. injection of 10kDa dextran. A: artery, V; Vein. NS: non-significant. All data are shown as mean+/-SEM. ANOVA followed by Bonferroni's multiple comparisons test was performed for statistical analysis between multiple groups. Source data are provided as a Source Data file.

# Supp Fig. 6

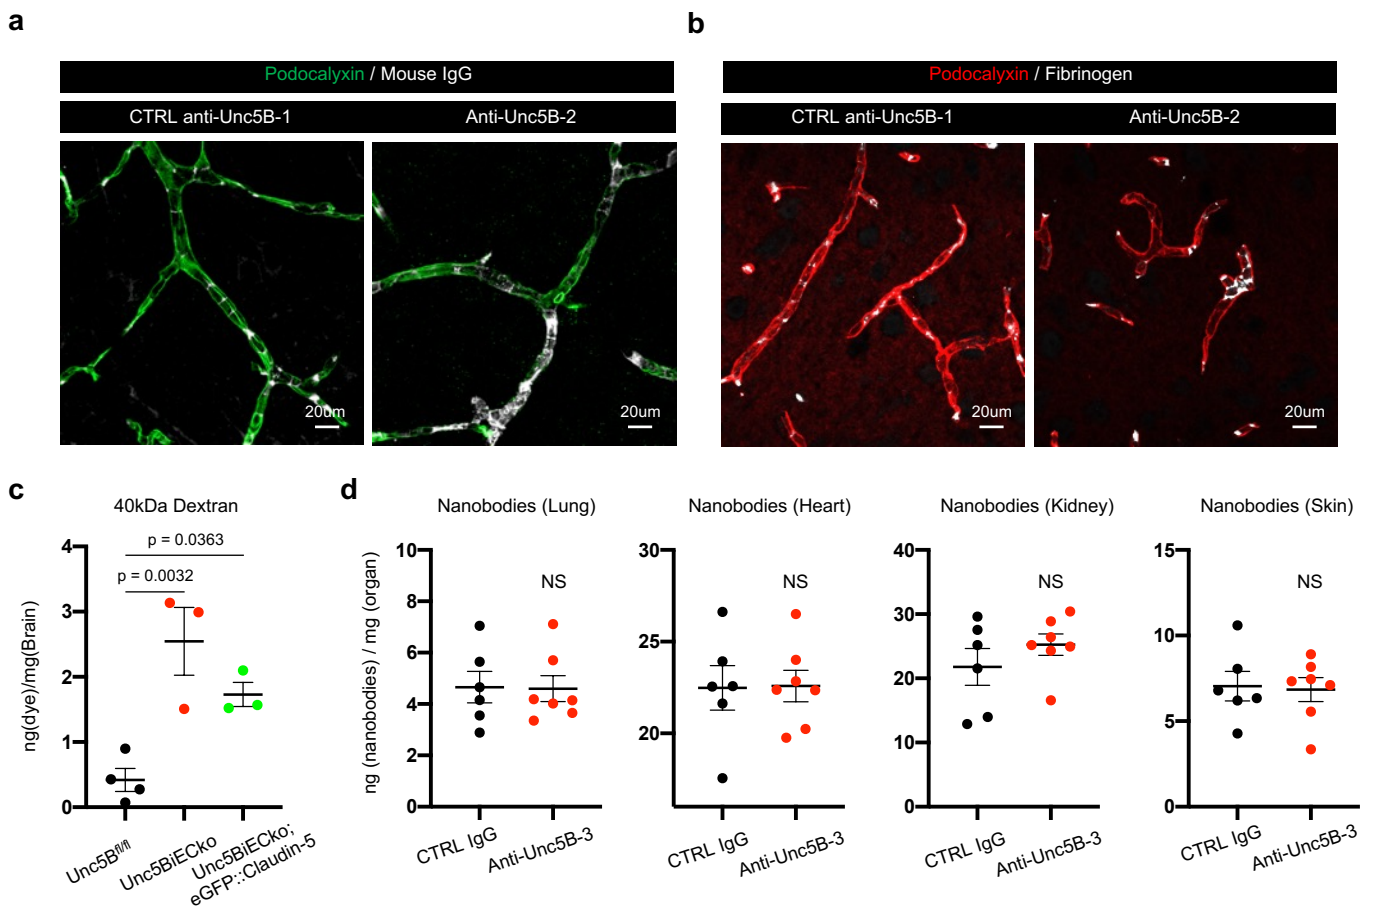

### Supplemental Figure 6:

(a,b) Immunofluorescence staining with the indicated antibodies and confocal imaging on brain sections from mice i.v. injected with CTRL anti-Unc5B-1 or anti-Unc5B-2 for 1h, reproduced on n=4 CTRL anti-Unc5B-1 and n=5 anti-Unc5B-2 treated animals. (c) Quantification of 40kDa dextran content in P67 brains, 30 min after i.v. 40kDa dextran injection, n=4 *Unc5B<sup>fl/fl</sup>*, n=3 *Unc5BiEcko* and n=3 *Unc5BiEcko;eGFP::Claudin-5* brains. Each dot represents one mouse. (d) Quantification of nanobody content in peripheral organs, 1h after i.v. CTRL IgG or anti-Unc5B-3 injection (10 mg/kg) and 30 min after i.v. nanobody injection, n=6 CTRL IgG and n=7 anti-Unc5B-3 treated mice. Each dot represents one mouse. All data are shown as mean+/-SEM. NS: non-significant, two-sided Mann-Whitney U test was performed for statistical analysis. ANOVA followed by Bonferroni's multiple comparisons test was performed for statistical analysis between multiple groups. Source data are provided as a Source Data file.

Supp Fig. 7

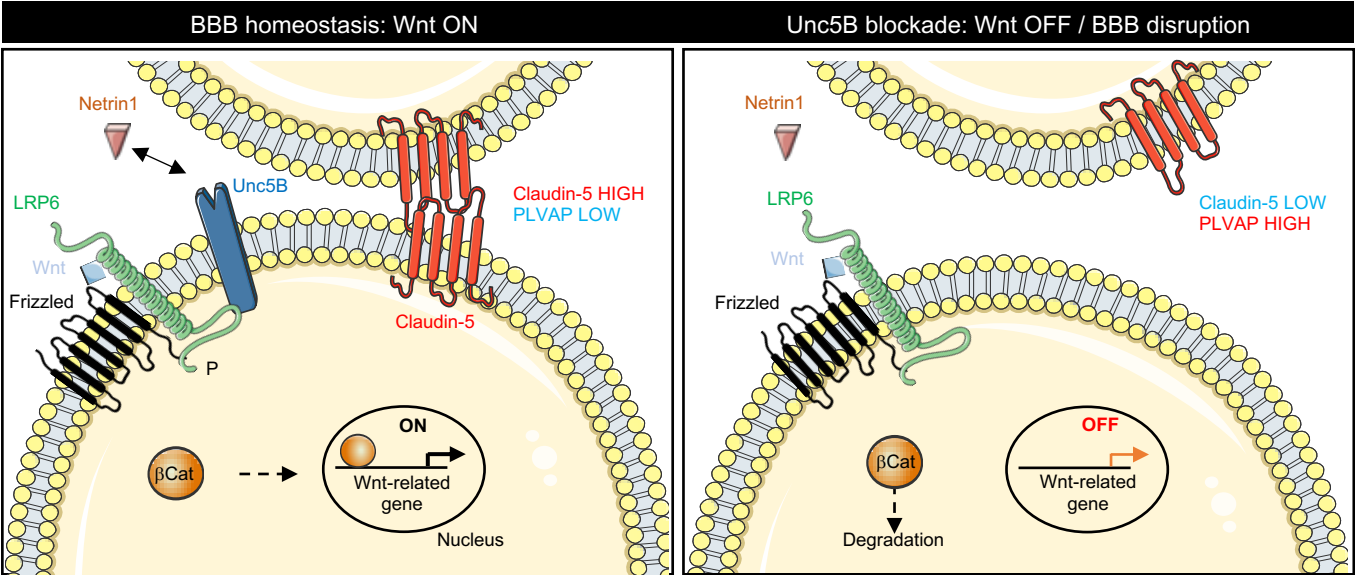

**Supplemental Figure 7:**

Working model. Netrin-1 binding to endothelial Unc5B maintains BBB integrity, by promoting LRP6 phosphorylation and Wnt/ $\beta$ -catenin-induced expression of Claudin-5 and repression of PLVAP. In the absence of Netrin-1-Unc5B signaling, the Wnt/ $\beta$ -catenin signaling is disrupted which induced loss of Claudin-5 along with increased PLVAP expression and BBB leakage. Figure was created using Servier Medical Art ([smart.servier.com](http://smart.servier.com)), licensed under a Creative Commons Attribution 3.0 Unported License

**Supp Fig. 8**

**a**

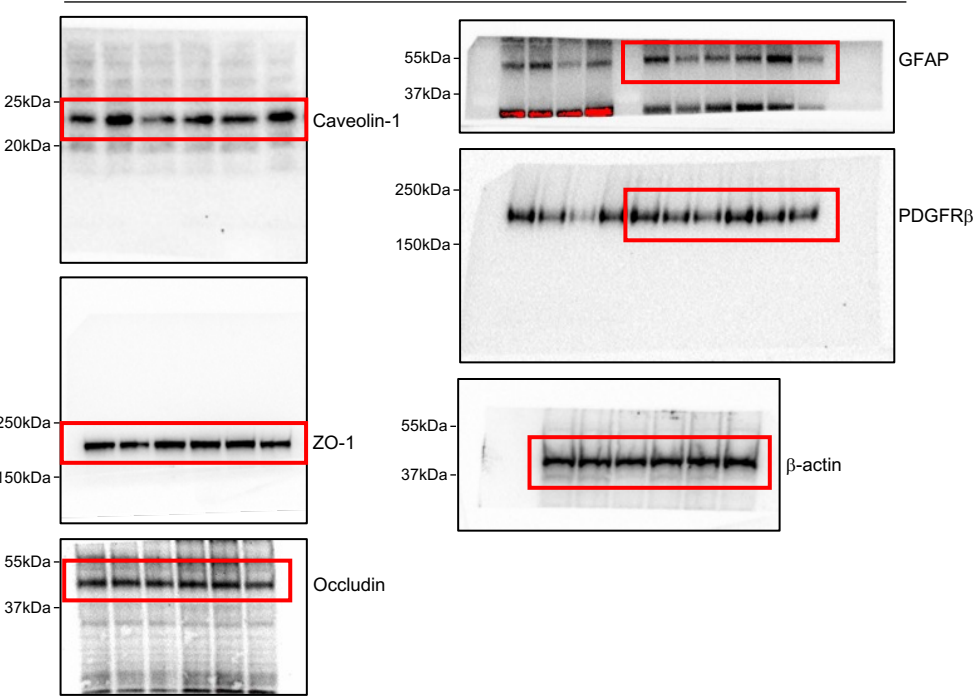

**b**

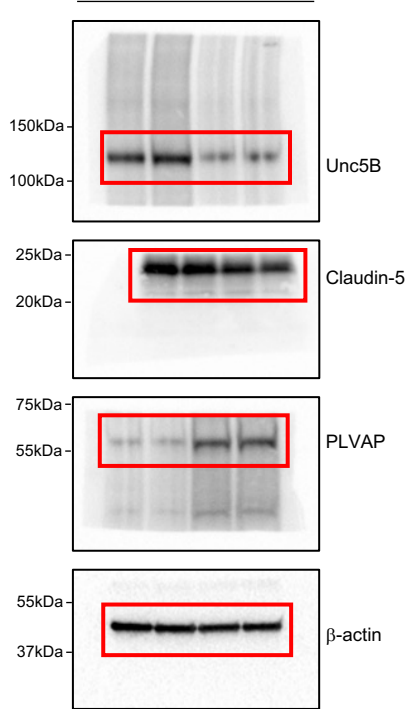

**c**

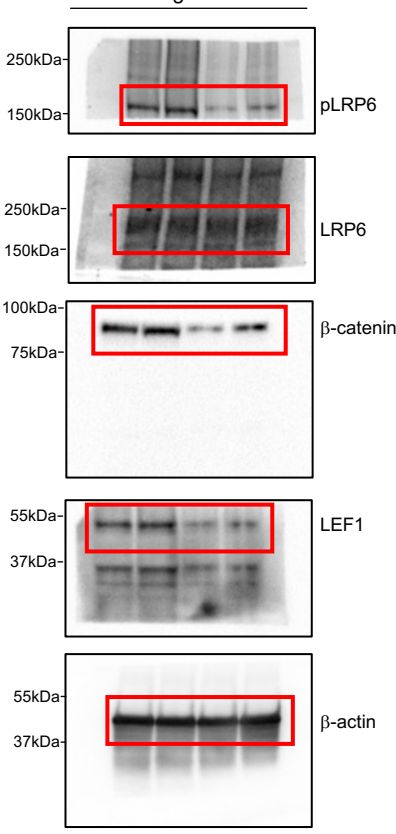

**d**

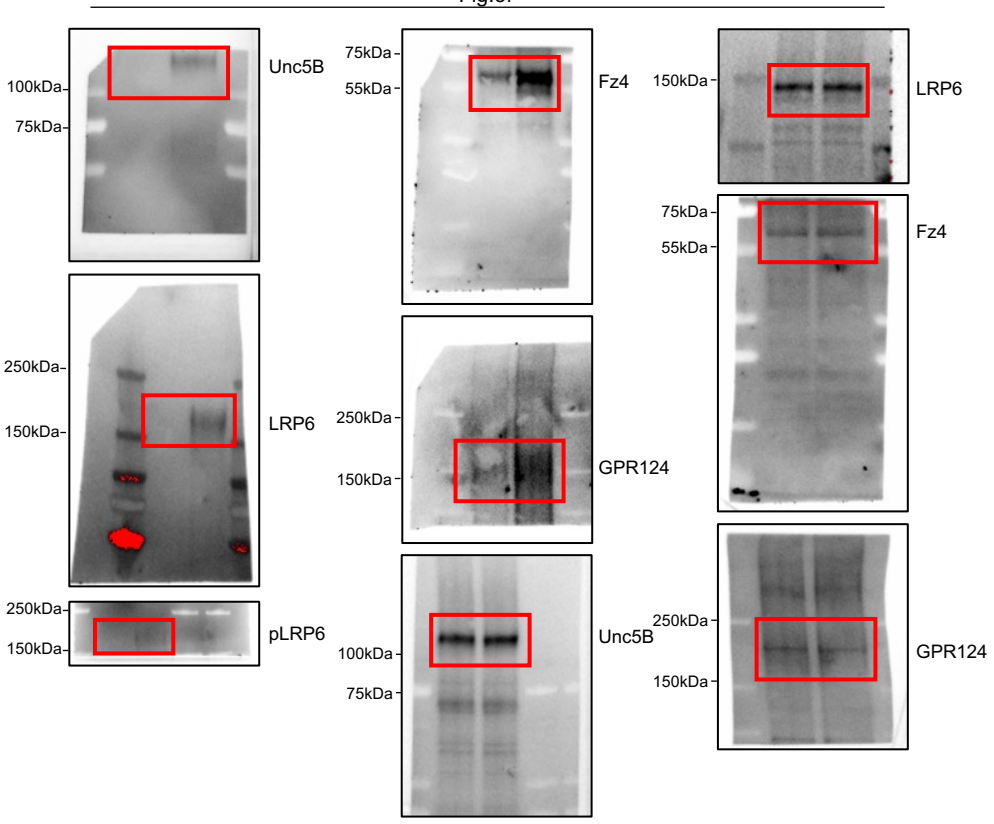

**Supplemental Figure 8:**

Uncropped western blots from (a) Fig. 2b, (b) Fig. 2f, (c) Fig. 3b, (d) Fig. 3f



# Supp Fig. 9

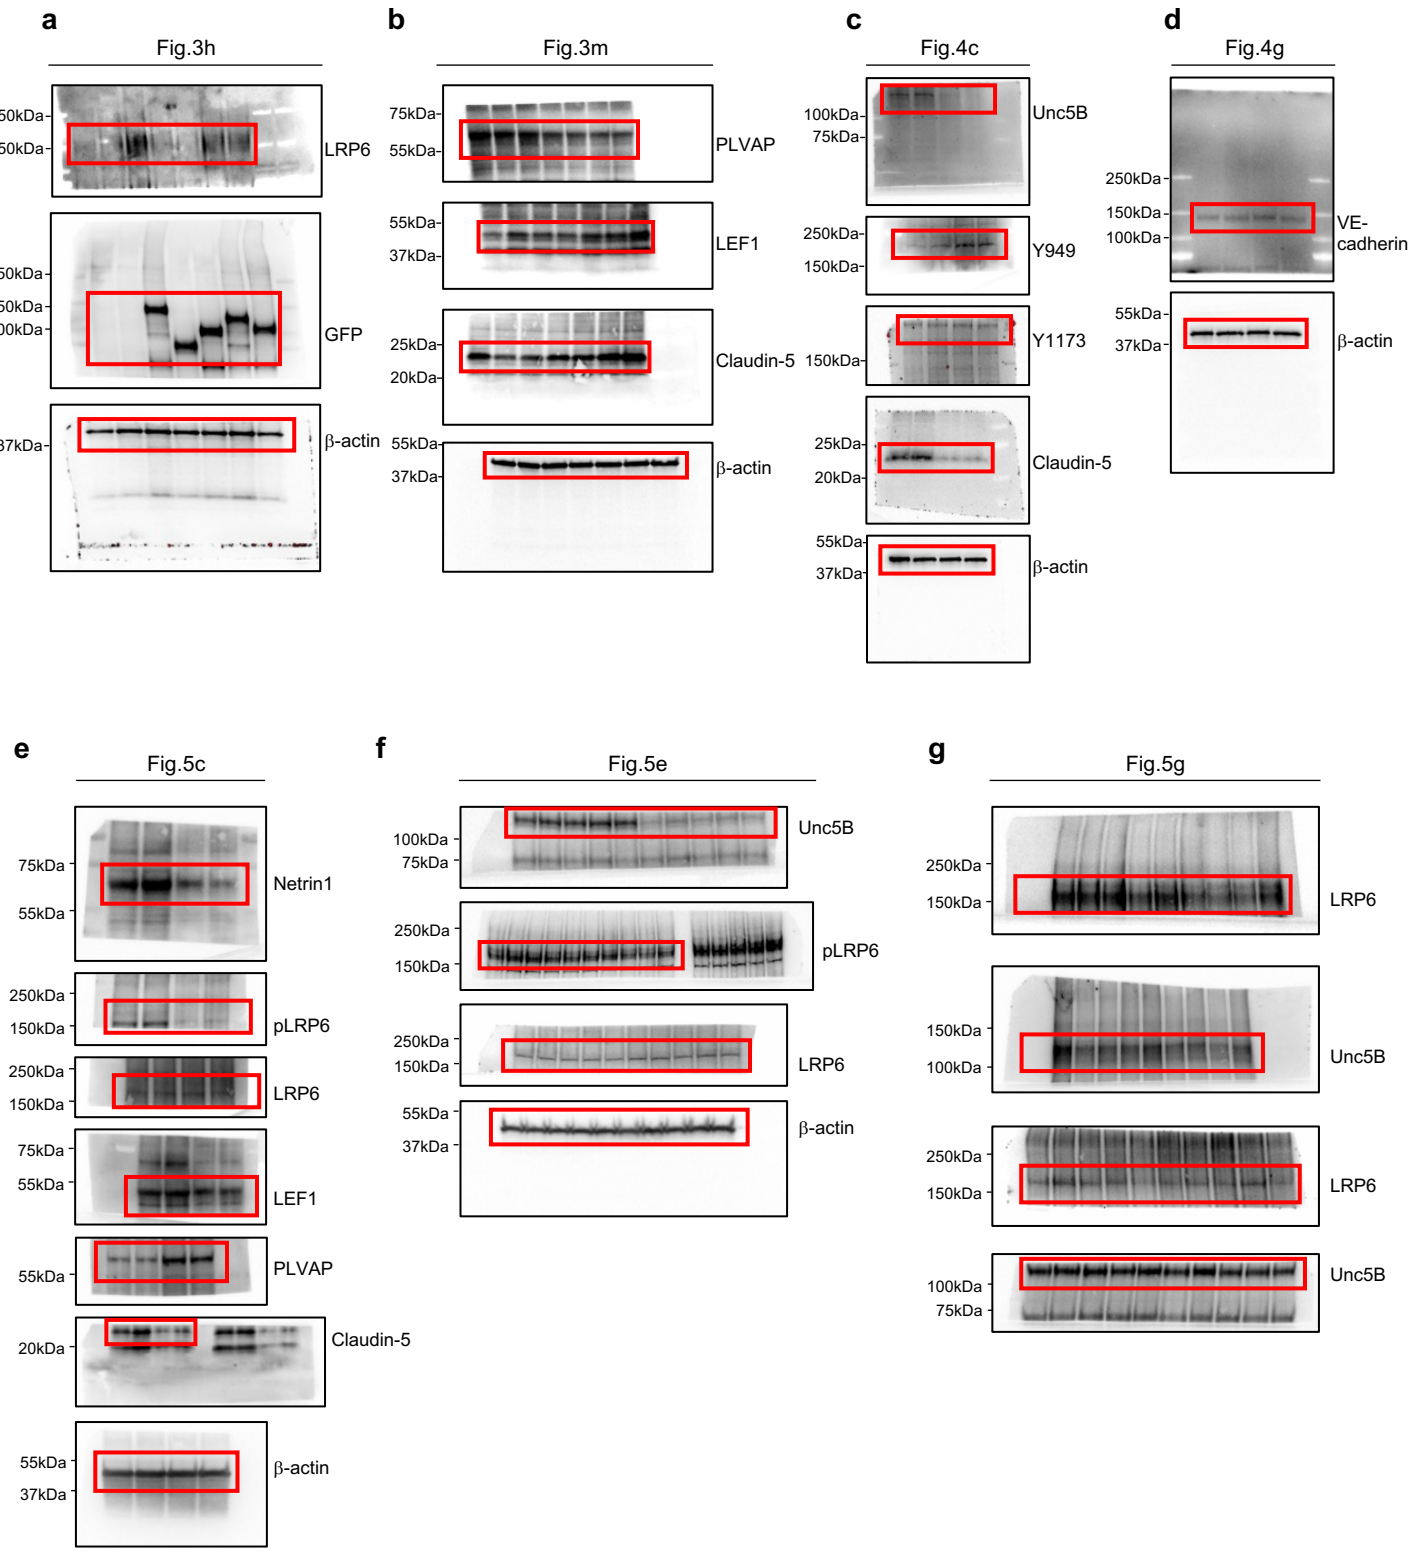

**Supplemental Figure 9:**

Uncropped western blots from (a) Fig. 3h, (b) Fig. 3m, (c) Fig. 4c, (d) Fig. 4g, (e) Fig. 5c, (f) Fig. 5e, (g) Fig. 5g

**Supp Fig. 10**

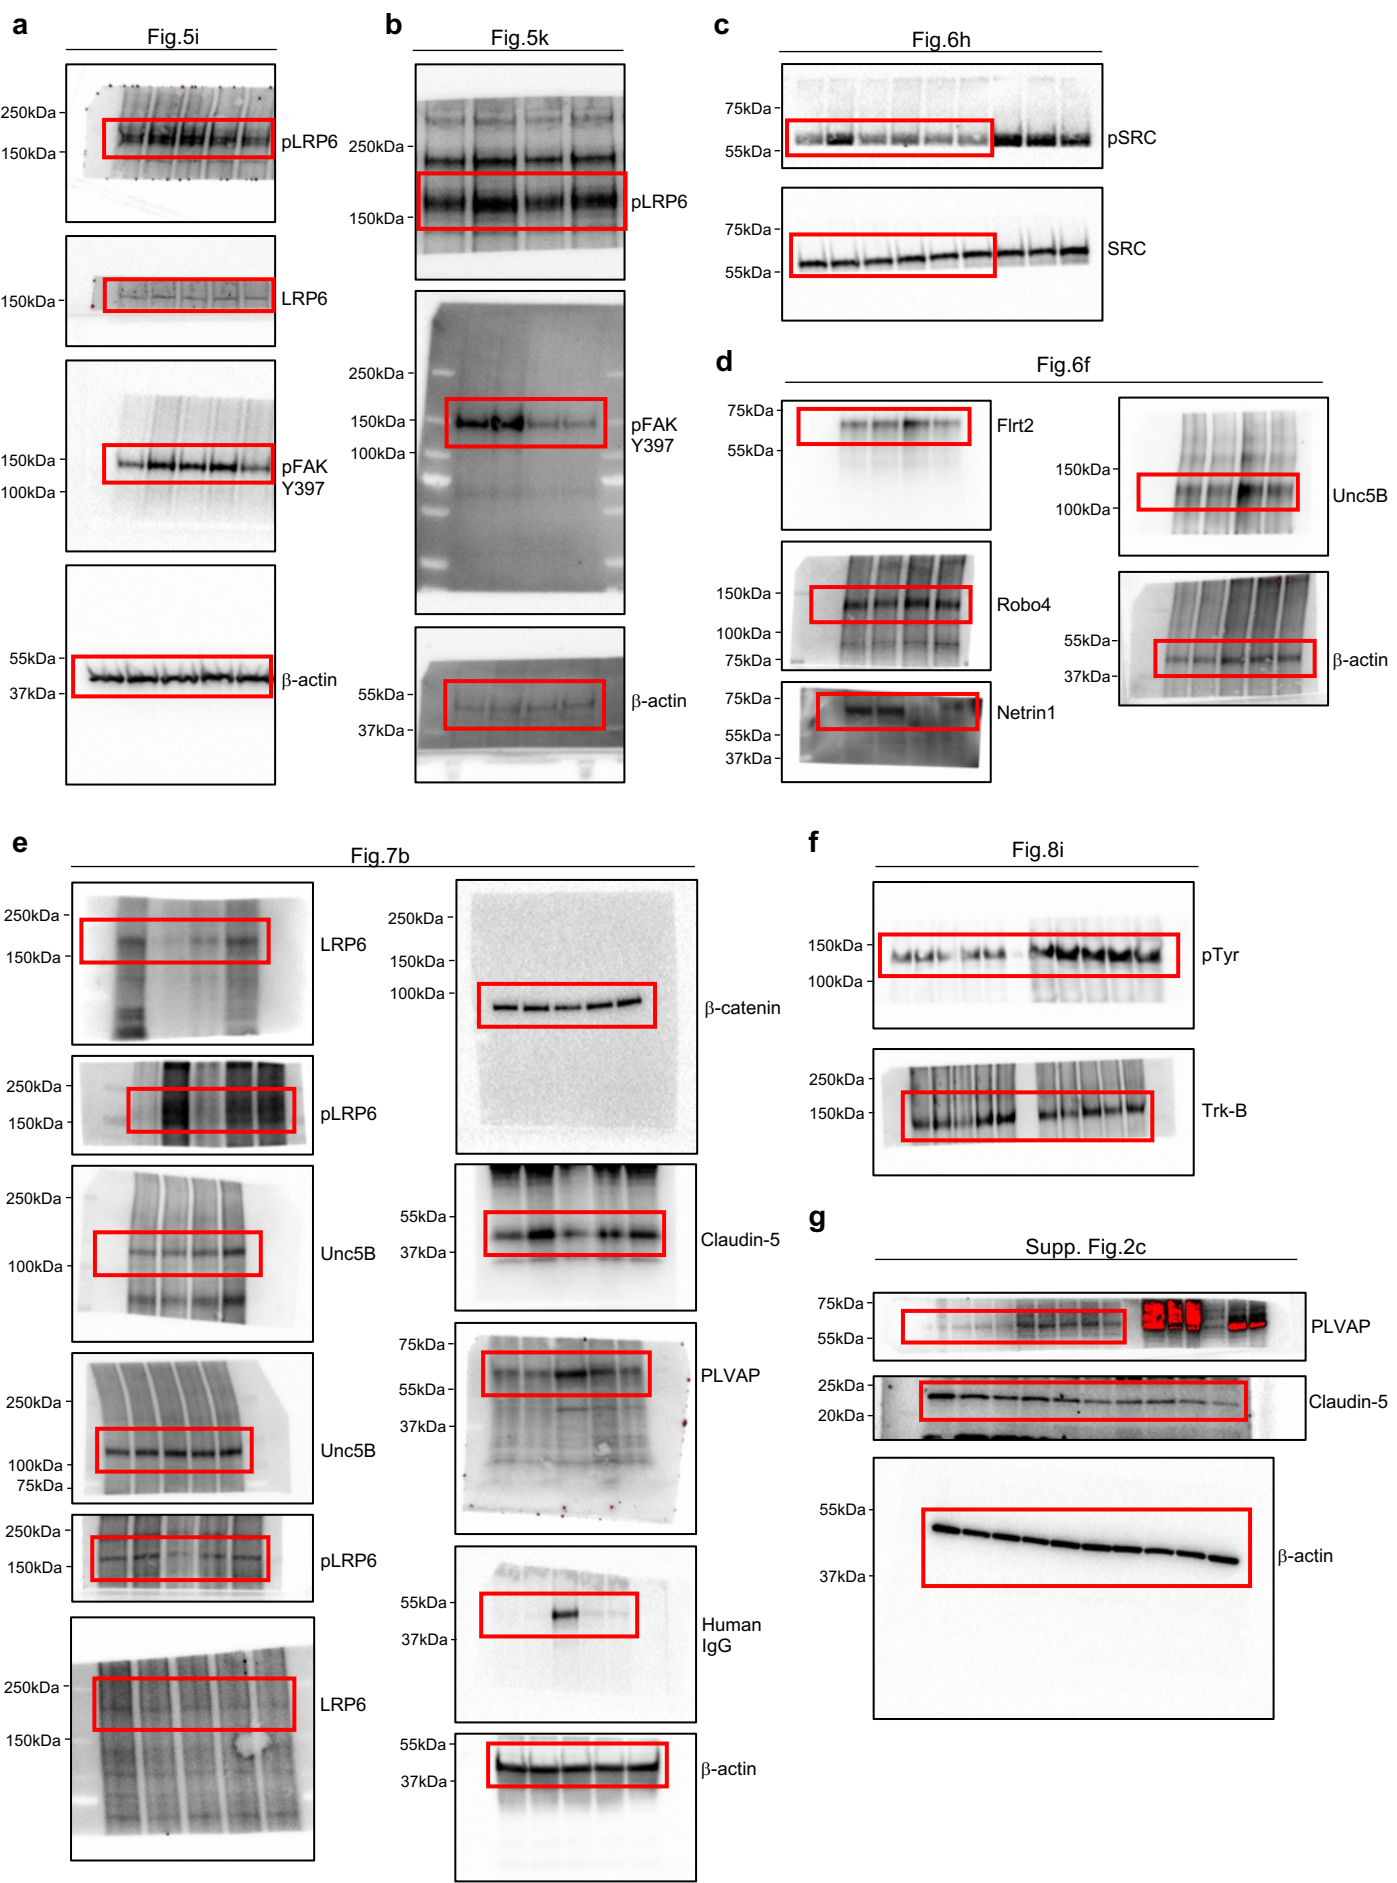

**Supplemental Figure 10:**

Uncropped western blots from (a) Fig. 5i, (b) Fig. 5k, (c) Fig. 6h, (d) Fig. 6f, (e) Fig. 7b, (f) Fig. 8i, (g) Supp. Fig. 2c

# Supp Fig.11

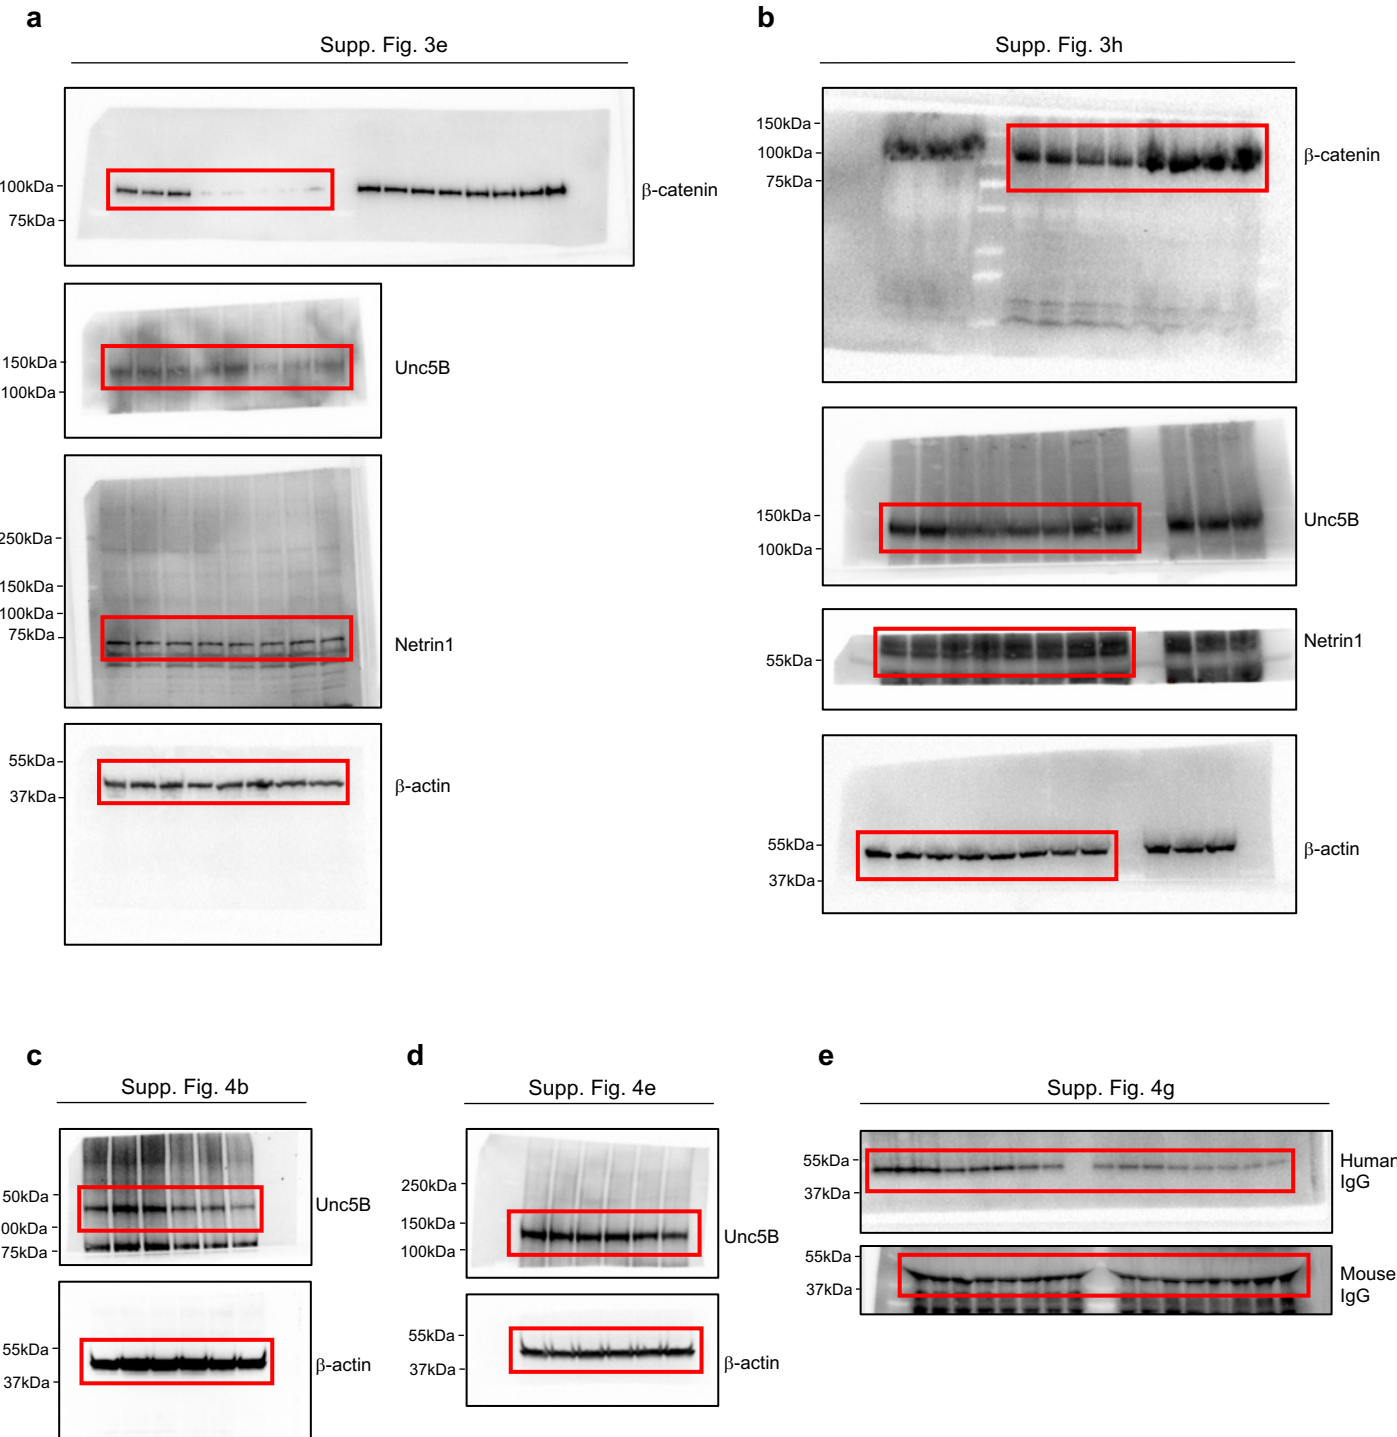

**Supplemental Figure 11:**

Uncropped western blots from (a) Supp. Fig. 3e, (b) Supp. Fig. 3h, (c) Supp. Fig. 4b, (d) Supp. Fig. 4e, (e) Supp. Fig. 4g
